# Supplementary material for: Automated Assay of a Four-Protein Biomarker Panel for Improved Detection of Ovarian Cancer
Source: PubMed Central journal article supplement (PMC7830619; doi:10.3390/cancers13020325), 2021-01-17
Supplement: cancers-13-00325-s001.pdf [file cancers-13-00325-s001.pdf]

Automated assay of four-protein biomarker panel for improved  
early detection of ovarian cancer  
(Supplementary Materials)

January 9, 2021

Table S1: Confusion matrices when applying KNN to identify the samples of patients in early stage cancer and healthy patients in data set 1 (E1 vs H1), using only CA-125 (left panel) and all four proteins (right panel). The samples from patients in early stage cancer and healthy patients in data set 1 (E1 vs H1) were used to train the model. Note that in this experiment the cohort of early stage cancer samples and healthy samples in data set 1 was divided into 60% for training and 40% for testing. This experiment is corresponding to experiment ID 1 in Table 3.

|           |         | Actual label |             |                    |
|-----------|---------|--------------|-------------|--------------------|
|           |         | Disease      | Healthy     | Prevalence<br>0.18 |
| Predicted | Disease | 5            | 0           | PPV<br>1           |
|           | Healthy | 2            | 32          | NPV<br>0.94        |
|           |         | Sensitivity  | Specificity | Accuracy           |
|           |         | 0.71         | 1           | 0.95               |

Using CA-125 alone

|           |         | Actual label |             |                    |
|-----------|---------|--------------|-------------|--------------------|
|           |         | Disease      | Healthy     | Prevalence<br>0.18 |
| Predicted | Disease | 6            | 0           | PPV<br>1           |
|           | Healthy | 1            | 32          | NPV<br>0.97        |
|           |         | Sensitivity  | Specificity | Accuracy           |
|           |         | 0.86         | 1           | 0.97               |

Using four proteins

Table S2: Confusion matrices when applying logistic regression to identify the samples of patients in early stage and healthy patients in data set 1 (E1 vs H1), using only CA-125 (left panel) and all four proteins (right panel). The samples from patients in early stage cancer and healthy patients in data set 1 (E1 vs H1) were used to train the model. Note that in this experiment the cohort of early stage cancer samples and healthy samples in data set 1 was divided into 60% for training and 40% for testing. This experiment is corresponding to experiment ID 1 in Table 3.

|           |         | Actual label |             |                    |
|-----------|---------|--------------|-------------|--------------------|
|           |         | Disease      | Healthy     | Prevalence<br>0.18 |
| Predicted | Disease | 6            | 0           | PPV<br>1           |
|           | Healthy | 1            | 32          | NPV<br>0.97        |
|           |         | Sensitivity  | Specificity | Accuracy           |
|           |         | 0.86         | 1           | 0.97               |

Using CA-125 alone

|           |         | Actual label |             |                    |
|-----------|---------|--------------|-------------|--------------------|
|           |         | Disease      | Healthy     | Prevalence<br>0.18 |
| Predicted | Disease | 4            | 0           | PPV<br>1           |
|           | Healthy | 3            | 32          | NPV<br>0.91        |
|           |         | Sensitivity  | Specificity | Accuracy           |
|           |         | 0.57         | 1           | 0.92               |

Using four proteins

Table S3: Confusion matrices when applying random forest to identify the samples of patients in early stage and healthy patients in data set 1 (E1 vs H1), using only CA-125 (left panel) and all four proteins (right panel). The samples from patients in early stage cancer and healthy patients in data set 1 (E1 vs H1) were used to train the model. Note that in this experiment the cohort of early stage cancer samples and healthy samples in data set 1 was divided into 60% for training and 40% for testing. This experiment is corresponding to experiment ID 1 in Table 3.

|           |         | Actual label |             |                    |
|-----------|---------|--------------|-------------|--------------------|
|           |         | Disease      | Healthy     | Prevalence<br>0.18 |
| Predicted | Disease | 5            | 7           | PPV<br>0.42        |
|           | Healthy | 2            | 25          | NPV<br>0.93        |
|           |         | Sensitivity  | Specificity | Accuracy           |
|           |         | 0.71         | 0.78        | 0.77               |

Using CA-125 alone

|           |         | Actual label |             |                    |
|-----------|---------|--------------|-------------|--------------------|
|           |         | Disease      | Healthy     | Prevalence<br>0.18 |
| Predicted | Disease | 7            | 0           | PPV<br>1           |
|           | Healthy | 0            | 32          | NPV<br>1           |
|           |         | Sensitivity  | Specificity | Accuracy           |
|           |         | 1            | 1           | 1                  |

Using four proteins

Table S4: Confusion matrices when applying SVM to identify the samples of patients in early stage and healthy patients in data set 1 (E1 vs H1), using only CA-125 (left panel) and all four proteins (right panel). The samples from patients in early stage cancer and healthy patients in data set 1 (E1 vs H1) were used to train the model. Note that in this experiment the cohort of early stage cancer samples and healthy samples in data set 1 was divided into 60% for training and 40% for testing. This experiment is corresponding to experiment ID 1 in Table 3.

|           |         | Actual label        |                  |                    |
|-----------|---------|---------------------|------------------|--------------------|
|           |         | Disease             | Healthy          | Prevalence<br>0.18 |
| Predicted | Disease | 5                   | 0                | PPV<br>1           |
|           | Healthy | 2                   | 32               | NPV<br>0.94        |
|           |         | Sensitivity<br>0.71 | Specificity<br>1 | Accuracy<br>0.95   |

Using CA-125 alone

|           |         | Actual label        |                  |                    |
|-----------|---------|---------------------|------------------|--------------------|
|           |         | Disease             | Healthy          | Prevalence<br>0.18 |
| Predicted | Disease | 5                   | 0                | PPV<br>1           |
|           | Healthy | 2                   | 32               | NPV<br>0.94        |
|           |         | Sensitivity<br>0.71 | Specificity<br>1 | Accuracy<br>0.95   |

Using four proteins

Table S5: Confusion matrices when applying KNN to identify the samples of patients in early stage and healthy patients in data set 2 (E2 vs H2), using only CA-125 (left panel) and all four proteins (right panel). The samples from patients in early stage cancer and healthy patients in data set 1 (E1 vs H1) were used to train the model. This experiment is corresponding to experiment ID 2 in Table 3.

|           |         | Actual label        |                     |                    |
|-----------|---------|---------------------|---------------------|--------------------|
|           |         | Disease             | Healthy             | Prevalence<br>0.09 |
| Predicted | Disease | 11                  | 23                  | PPV<br>0.32        |
|           | Healthy | 8                   | 176                 | NPV<br>0.96        |
|           |         | Sensitivity<br>0.58 | Specificity<br>0.88 | Accuracy<br>0.86   |

Using CA-125 alone

|           |         | Actual label        |                     |                    |
|-----------|---------|---------------------|---------------------|--------------------|
|           |         | Disease             | Healthy             | Prevalence<br>0.09 |
| Predicted | Disease | 13                  | 2                   | PPV<br>0.87        |
|           | Healthy | 6                   | 196                 | NPV<br>0.97        |
|           |         | Sensitivity<br>0.68 | Specificity<br>0.99 | Accuracy<br>0.97   |

Using four proteins

Table S6: Confusion matrices when applying logistic regression to identify the samples of patients in early stage and healthy patients in data set 2 (E2 vs H2), using only CA-125 (left panel) and all four proteins (right panel). The samples from patients in early stage cancer and healthy patients in data set 1 (E1 vs H1) were used to train the model. This experiment is corresponding to experiment ID 2 in Table 3.

|           |         | Actual label        |                     |                    |
|-----------|---------|---------------------|---------------------|--------------------|
|           |         | Disease             | Healthy             | Prevalence<br>0.09 |
| Predicted | Disease | 12                  | 26                  | PPV<br>0.32        |
|           | Healthy | 7                   | 173                 | NPV<br>0.96        |
|           |         | Sensitivity<br>0.63 | Specificity<br>0.87 | Accuracy<br>0.85   |

Using CA-125 alone

|           |         | Actual label        |                     |                    |
|-----------|---------|---------------------|---------------------|--------------------|
|           |         | Disease             | Healthy             | Prevalence<br>0.09 |
| Predicted | Disease | 11                  | 1                   | PPV<br>0.92        |
|           | Healthy | 8                   | 198                 | NPV<br>0.96        |
|           |         | Sensitivity<br>0.58 | Specificity<br>0.99 | Accuracy<br>0.96   |

Using four proteins

Table S7: Confusion matrices when applying random forest to identify the samples of patients in early stage and healthy patients in data set 2 (E2 vs H2), using only CA-125 (left panel) and all four proteins (right panel). The samples from patients in early stage cancer and healthy patients in data set 1 (E1 vs H1) were used to train the model. This experiment is corresponding to experiment ID 2 in Table 3.

|           |         | Actual label |             |                    |
|-----------|---------|--------------|-------------|--------------------|
|           |         | Disease      | Healthy     | Prevalence<br>0.09 |
| Predicted | Disease | 11           | 35          | PPV<br>0.24        |
|           | Healthy | 8            | 164         | NPV<br>0.95        |
|           |         | Sensitivity  | Specificity | Accuracy           |
|           |         | 0.58         | 0.82        | 0.80               |

Using CA-125 alone

|           |         | Actual label |             |                    |
|-----------|---------|--------------|-------------|--------------------|
|           |         | Disease      | Healthy     | Prevalence<br>0.09 |
| Predicted | Disease | 14           | 6           | PPV<br>0.7         |
|           | Healthy | 5            | 193         | NPV<br>0.97        |
|           |         | Sensitivity  | Specificity | Accuracy           |
|           |         | 0.74         | 0.97        | 0.95               |

Using four proteins

Table S8: Confusion matrices when applying SVM to identify the samples of patients in early stage and healthy patients in data set 2 (E2 vs H2), using only CA-125 (left panel) and all four proteins (right panel). The samples from patients in early stage cancer and healthy patients in data set 1 (E1 vs H1) were used to train the model. This experiment is corresponding to experiment ID 2 in Table 3.

|           |         | Actual label |             |                    |
|-----------|---------|--------------|-------------|--------------------|
|           |         | Disease      | Healthy     | Prevalence<br>0.09 |
| Predicted | Disease | 9            | 12          | PPV<br>0.43        |
|           | Healthy | 10           | 187         | NPV<br>0.95        |
|           |         | Sensitivity  | Specificity | Accuracy           |
|           |         | 0.47         | 0.94        | 0.90               |

Using CA-125 alone

|           |         | Actual label |             |                    |
|-----------|---------|--------------|-------------|--------------------|
|           |         | Disease      | Healthy     | Prevalence<br>0.09 |
| Predicted | Disease | 14           | 9           | PPV<br>0.61        |
|           | Healthy | 5            | 190         | NPV<br>0.97        |
|           |         | Sensitivity  | Specificity | Accuracy           |
|           |         | 0.74         | 0.95        | 0.94               |

Using four proteins

Table S9: Confusion matrices when applying KNN to identify the samples of ovarian cancer patients and healthy patients in data set 2 (C2 vs H2), using only CA-125 (left panel) and all four proteins (right panel). The samples from patients in early stage cancer and healthy patients in data set 1 (E1 vs H1) were used to train the model. This experiment is corresponding to experiment ID 3 in Table 3.

|           |         | Actual label |             |                    |
|-----------|---------|--------------|-------------|--------------------|
|           |         | Disease      | Healthy     | Prevalence<br>0.29 |
| Predicted | Disease | 44           | 6           | PPV<br>0.88        |
|           | Healthy | 36           | 193         | NPV<br>0.84        |
|           |         | Sensitivity  | Specificity | Accuracy           |
|           |         | 0.55         | 0.97        | 0.85               |

Using CA-125 alone

|           |         | Actual label |             |                    |
|-----------|---------|--------------|-------------|--------------------|
|           |         | Disease      | Healthy     | Prevalence<br>0.29 |
| Predicted | Disease | 40           | 0           | PPV<br>1           |
|           | Healthy | 40           | 199         | NPV<br>0.83        |
|           |         | Sensitivity  | Specificity | Accuracy           |
|           |         | 0.5          | 1           | 0.86               |

Using four proteins

Table S10: Confusion matrices when applying logistic regression to identify the samples of ovarian cancer patients and healthy patients in data set 2 (C2 vs H2), using only CA-125 (left panel) and all four proteins (right panel). The samples from patients in early stage cancer and healthy patients in data set 1 (E1 vs H1) were used to train the model. This experiment is corresponding to experiment ID 3 in Table 3.

|           |         | Actual label |             |                    |
|-----------|---------|--------------|-------------|--------------------|
|           |         | Disease      | Healthy     | Prevalence<br>0.29 |
| Predicted | Disease | 45           | 6           | PPV<br>0.88        |
|           | Healthy | 35           | 193         | NPV<br>0.85        |
|           |         | Sensitivity  | Specificity | Accuracy           |
|           |         | 0.58         | 0.97        | 0.85               |

Using CA-125 alone

|           |         | Actual label |             |                    |
|-----------|---------|--------------|-------------|--------------------|
|           |         | Disease      | Healthy     | Prevalence<br>0.29 |
| Predicted | Disease | 34           | 1           | PPV<br>0.97        |
|           | Healthy | 46           | 198         | NPV<br>0.81        |
|           |         | Sensitivity  | Specificity | Accuracy           |
|           |         | 0.42         | 1           | 0.83               |

Using four proteins

Table S11: Confusion matrices when applying random forest to identify the samples of ovarian cancer patients and healthy patients in data set 2 (C2 vs H2), using only CA-125 (left panel) and all four proteins (right panel). The samples from patients in early stage cancer and healthy patients in data set 1 (E1 vs H1) were used to train the model. This experiment is corresponding to experiment ID 3 in Table 3.

|           |         | Actual label |             |                    |
|-----------|---------|--------------|-------------|--------------------|
|           |         | Disease      | Healthy     | Prevalence<br>0.29 |
| Predicted | Disease | 47           | 15          | PPV<br>0.76        |
|           | Healthy | 33           | 184         | NPV<br>0.85        |
|           |         | Sensitivity  | Specificity | Accuracy           |
|           |         | 0.59         | 0.92        | 0.83               |

Using CA-125 alone

|           |         | Actual label |             |                    |
|-----------|---------|--------------|-------------|--------------------|
|           |         | Disease      | Healthy     | Prevalence<br>0.29 |
| Predicted | Disease | 50           | 3           | PPV<br>0.94        |
|           | Healthy | 30           | 196         | NPV<br>0.87        |
|           |         | Sensitivity  | Specificity | Accuracy           |
|           |         | 0.63         | 0.98        | 0.88               |

Using four proteins

Table S12: Confusion matrices when applying SVM to identify the samples of ovarian cancer patients and healthy patients in data set 2 (C2 vs H2), using only CA-125 (left panel) and all four proteins (right panel). The samples from patients in early stage cancer and healthy patients in data set 1 (E1 vs H1) were used to train the model. This experiment is corresponding to experiment ID 3 in Table 3.

|           |         | Actual label |             |                    |
|-----------|---------|--------------|-------------|--------------------|
|           |         | Disease      | Healthy     | Prevalence<br>0.29 |
| Predicted | Disease | 39           | 2           | PPV<br>0.95        |
|           | Healthy | 41           | 197         | NPV<br>0.83        |
|           |         | Sensitivity  | Specificity | Accuracy           |
|           |         | 0.49         | 0.99        | 0.85               |

Using CA-125 alone

|           |         | Actual label |             |                    |
|-----------|---------|--------------|-------------|--------------------|
|           |         | Disease      | Healthy     | Prevalence<br>0.29 |
| Predicted | Disease | 53           | 5           | PPV<br>0.91        |
|           | Healthy | 27           | 194         | NPV<br>0.88        |
|           |         | Sensitivity  | Specificity | Accuracy           |
|           |         | 0.66         | 0.97        | 0.89               |

Using four proteins

Table S13: Confusion matrices when applying KNN to identify the samples of patients in late stage and healthy patients in data set 1 (L1 vs H1), using only CA-125 (left panel) and all four proteins (right panel). The samples from patients in late stage cancer and healthy patients in data set 1 (L1 vs H1) were used to train the model. Note that in this experiment the cohort of late stage cancer samples and healthy samples in data set 1 was divided into 60% for training and 40% for testing. This experiment is corresponding to experiment ID 4 in Table 3.

|           |         | Actual label |                     |                    |
|-----------|---------|--------------|---------------------|--------------------|
|           |         | Disease      | Healthy             | Prevalence<br>0.41 |
| Predicted | Disease | 17           | 0                   | PPV<br>1           |
|           | Healthy | 5            | 32                  | NPV<br>0.86        |
|           |         |              | Sensitivity<br>0.77 | Specificity<br>1   |

Using CA-125 alone

|           |         | Actual label |                  |                    |
|-----------|---------|--------------|------------------|--------------------|
|           |         | Disease      | Healthy          | Prevalence<br>0.41 |
| Predicted | Disease | 22           | 0                | PPV<br>1           |
|           | Healthy | 0            | 32               | NPV<br>1           |
|           |         |              | Sensitivity<br>1 | Specificity<br>1   |

Using four proteins

Table S14: Confusion matrices when applying logistic regression to identify the samples of patients in late stage and healthy patients in data set 1 (L1 vs H1), using only CA-125 (left panel) and all four proteins (right panel). The samples from patients in late stage cancer and healthy patients in data set 1 (L1 vs H1) were used to train the model. Note that in this experiment the cohort of late stage cancer samples and healthy samples in data set 1 was divided into 60% for training and 40% for testing. This experiment is corresponding to experiment ID 4 in Table 3.

|           |         | Actual label |                     |                     |
|-----------|---------|--------------|---------------------|---------------------|
|           |         | Disease      | Healthy             | Prevalence<br>0.41  |
| Predicted | Disease | 17           | 1                   | PPV<br>0.92         |
|           | Healthy | 5            | 31                  | NPV<br>0.94         |
|           |         |              | Sensitivity<br>0.92 | Specificity<br>0.94 |

Using CA-125 alone

|           |         | Actual label |                  |                    |
|-----------|---------|--------------|------------------|--------------------|
|           |         | Disease      | Healthy          | Prevalence<br>0.41 |
| Predicted | Disease | 22           | 0                | PPV<br>1           |
|           | Healthy | 0            | 32               | NPV<br>1           |
|           |         |              | Sensitivity<br>1 | Specificity<br>1   |

Using four proteins

Table S15: Confusion matrices when applying random forest to identify the samples of patients in late stage and healthy patients in data set 1 (L1 vs H1), using only CA-125 (left panel) and all four proteins (right panel). The samples from patients in late stage cancer and healthy patients in data set 1 (L1 vs H1) were used to train the model. Note that in this experiment the cohort of late stage cancer samples and healthy samples in data set 1 was divided into 60% for training and 40% for testing. This experiment is corresponding to experiment ID 4 in Table 3.

|           |         | Actual label |                     |                     |
|-----------|---------|--------------|---------------------|---------------------|
|           |         | Disease      | Healthy             | Prevalence<br>0.41  |
| Predicted | Disease | 20           | 2                   | PPV<br>0.91         |
|           | Healthy | 2            | 30                  | NPV<br>0.94         |
|           |         |              | Sensitivity<br>0.91 | Specificity<br>0.94 |

Using CA-125 alone

|           |         | Actual label |                  |                    |
|-----------|---------|--------------|------------------|--------------------|
|           |         | Disease      | Healthy          | Prevalence<br>0.41 |
| Predicted | Disease | 22           | 0                | PPV<br>1           |
|           | Healthy | 0            | 32               | NPV<br>1           |
|           |         |              | Sensitivity<br>1 | Specificity<br>1   |

Using four proteins

Table S16: Confusion matrices when applying SVM to identify the samples of patients in late stage and healthy patients in data set 1 (L1 vs H1), using only CA-125 (left panel) and all four proteins (right panel). The samples from patients in late stage cancer and healthy patients in data set 1 (L1 vs H1) were used to train the model. Note that in this experiment the cohort of late stage cancer samples and healthy samples in data set 1 was divided into 60% for training and 40% for testing. This experiment is corresponding to experiment ID 4 in Table 3.

|           |         | Actual label        |                  |                    |
|-----------|---------|---------------------|------------------|--------------------|
|           |         | Disease             | Healthy          | Prevalence<br>0.41 |
| Predicted | Disease | 17                  | 0                | PPV<br>1           |
|           | Healthy | 5                   | 32               | NPV<br>0.86        |
|           |         | Sensitivity<br>0.77 | Specificity<br>1 | Accuracy<br>0.91   |

Using CA-125 alone

|           |         | Actual label     |                  |                    |
|-----------|---------|------------------|------------------|--------------------|
|           |         | Disease          | Healthy          | Prevalence<br>0.41 |
| Predicted | Disease | 22               | 0                | PPV<br>1           |
|           | Healthy | 0                | 32               | NPV<br>1           |
|           |         | Sensitivity<br>1 | Specificity<br>1 | Accuracy<br>1      |

Using four proteins

Table S17: Confusion matrices when applying KNN to identify the samples of patients in late stage and healthy patients in data set 2 (L2 vs H2), using only CA-125 (left panel) and all four proteins (right panel). The samples from patients in late stage cancer and healthy patients in data set 1 (L1 vs H1) were used to train the model. This experiment is corresponding to experiment ID 5 in Table 3.

|           |         | Actual label        |                     |                    |
|-----------|---------|---------------------|---------------------|--------------------|
|           |         | Disease             | Healthy             | Prevalence<br>0.23 |
| Predicted | Disease | 40                  | 24                  | PPV<br>0.63        |
|           | Healthy | 21                  | 175                 | NPV<br>0.89        |
|           |         | Sensitivity<br>0.66 | Specificity<br>0.88 | Accuracy<br>0.83   |

Using CA-125 alone

|           |         | Actual label        |                     |                    |
|-----------|---------|---------------------|---------------------|--------------------|
|           |         | Disease             | Healthy             | Prevalence<br>0.23 |
| Predicted | Disease | 42                  | 5                   | PPV<br>0.89        |
|           | Healthy | 19                  | 194                 | NPV<br>0.91        |
|           |         | Sensitivity<br>0.69 | Specificity<br>0.97 | Accuracy<br>0.91   |

Using four proteins

Table S18: Confusion matrices when applying logistic regression to identify the samples of patients in late stage and healthy patients in data set 2 (L2 vs H2), using only CA-125 (left panel) and all four proteins (right panel). The samples from patients in late stage cancer and healthy patients in data set 1 (L1 vs H1) were used to train the model. This experiment is corresponding to experiment ID 5 in Table 3.

|           |         | Actual label        |                     |                    |
|-----------|---------|---------------------|---------------------|--------------------|
|           |         | Disease             | Healthy             | Prevalence<br>0.23 |
| Predicted | Disease | 40                  | 24                  | PPV<br>0.63        |
|           | Healthy | 21                  | 175                 | NPV<br>0.89        |
|           |         | Sensitivity<br>0.66 | Specificity<br>0.88 | Accuracy<br>0.83   |

Using CA-125 alone

|           |         | Actual label        |                     |                    |
|-----------|---------|---------------------|---------------------|--------------------|
|           |         | Disease             | Healthy             | Prevalence<br>0.23 |
| Predicted | Disease | 45                  | 5                   | PPV<br>0.9         |
|           | Healthy | 16                  | 194                 | NPV<br>0.92        |
|           |         | Sensitivity<br>0.74 | Specificity<br>0.97 | Accuracy<br>0.92   |

Using four proteins

Table S19: Confusion matrices when applying random forest to identify the samples of patients in late stage and healthy patients in data set 2 (L2 vs H2), using only CA-125 (left panel) and all four proteins (right panel). The samples from patients in late stage cancer and healthy patients in data set 1 (L1 vs H1) were used to train the model. This experiment is corresponding to experiment ID 5 in Table 3.

|           |         | Actual label        |                     |                    |           |         | Actual label        |                     |                    |
|-----------|---------|---------------------|---------------------|--------------------|-----------|---------|---------------------|---------------------|--------------------|
|           |         | Disease             | Healthy             | Prevalence<br>0.23 |           |         | Disease             | Healthy             | Prevalence<br>0.23 |
| Predicted | Disease | 40                  | 24                  | PPV<br>0.63        | Predicted | Disease | 46                  | 10                  | PPV<br>0.82        |
|           | Healthy | 21                  | 175                 | NPV<br>0.89        |           | Healthy | 15                  | 189                 | NPV<br>0.93        |
|           |         | Sensitivity<br>0.66 | Specificity<br>0.88 | Accuracy<br>0.83   |           |         | Sensitivity<br>0.75 | Specificity<br>0.95 | Accuracy<br>0.9    |

Using CA-125 alone

Using four proteins

Table S20: Confusion matrices when applying SVM to identify the samples of patients in late stage and healthy patients in data set 2 (L2 vs H2), using only CA-125 (left panel) and all four proteins (right panel). The samples from patients in late stage cancer and healthy patients in data set 1 (L1 vs H1) were used to train the model. This experiment is corresponding to experiment ID 5 in Table 3.

|           |         | Actual label        |                     |                    |           |         | Actual label        |                     |                    |
|-----------|---------|---------------------|---------------------|--------------------|-----------|---------|---------------------|---------------------|--------------------|
|           |         | Disease             | Healthy             | Prevalence<br>0.23 |           |         | Disease             | Healthy             | Prevalence<br>0.23 |
| Predicted | Disease | 38                  | 6                   | PPV<br>0.86        | Predicted | Disease | 45                  | 7                   | PPV<br>0.87        |
|           | Healthy | 23                  | 193                 | NPV<br>0.89        |           | Healthy | 16                  | 192                 | NPV<br>0.92        |
|           |         | Sensitivity<br>0.62 | Specificity<br>0.97 | Accuracy<br>0.89   |           |         | Sensitivity<br>0.74 | Specificity<br>0.96 | Accuracy<br>0.91   |

Using CA-125 alone

Using four proteins

Table S21: Confusion matrices when applying KNN to identify the samples of ovarian cancer patients and healthy patients in data set 2 (C2 vs H2), using only CA-125 (left panel) and all four proteins (right panel). The samples from patients in late stage cancer and healthy patients in data set 1 (L1 vs H1) were used to train the model. This experiment is corresponding to experiment ID 6 in Table 3.

|           |         | Actual label        |                     |                    |           |         | Actual label       |                     |                    |
|-----------|---------|---------------------|---------------------|--------------------|-----------|---------|--------------------|---------------------|--------------------|
|           |         | Disease             | Healthy             | Prevalence<br>0.29 |           |         | Disease            | Healthy             | Prevalence<br>0.29 |
| Predicted | Disease | 53                  | 33                  | PPV<br>0.62        | Predicted | Disease | 56                 | 4                   | PPV<br>0.93        |
|           | Healthy | 27                  | 166                 | NPV<br>0.86        |           | Healthy | 24                 | 195                 | NPV<br>0.89        |
|           |         | Sensitivity<br>0.66 | Specificity<br>0.83 | Accuracy<br>0.78   |           |         | Sensitivity<br>0.7 | Specificity<br>0.98 | Accuracy<br>0.9    |

Using CA-125 alone

Using four proteins

Table S22: Confusion matrices when applying logistic regression to identify the samples of ovarian cancer patients and healthy patients in data set 2 (C2 vs H2), using only CA-125 (left panel) and all four proteins (right panel). The samples from patients in late stage cancer and healthy patients in data set 1 (L1 vs H1) were used to train the model. This experiment is corresponding to experiment ID 6 in Table 3.

|           |         | Actual label        |                     |                    |
|-----------|---------|---------------------|---------------------|--------------------|
|           |         | Disease             | Healthy             | Prevalence<br>0.29 |
| Predicted | Disease | 52                  | 22                  | PPV<br>0.7         |
|           | Healthy | 28                  | 177                 | NPV<br>0.86        |
|           |         | Sensitivity<br>0.65 | Specificity<br>0.89 | Accuracy<br>0.82   |

Using CA-125 alone

|           |         | Actual label        |                     |                    |
|-----------|---------|---------------------|---------------------|--------------------|
|           |         | Disease             | Healthy             | Prevalence<br>0.29 |
| Predicted | Disease | 61                  | 7                   | PPV<br>0.9         |
|           | Healthy | 19                  | 192                 | NPV<br>0.91        |
|           |         | Sensitivity<br>0.76 | Specificity<br>0.96 | Accuracy<br>0.91   |

Using four proteins

Table S23: Confusion matrices when applying random forest to identify the samples of ovarian cancer patients and healthy patients in data set 2 (C2 vs H2), using only CA-125 (left panel) and all four proteins (right panel). The samples from patients in late stage cancer and healthy patients in data set 1 (L1 vs H1) were used to train the model. This experiment is corresponding to experiment ID 6 in Table 3.

|           |         | Actual label        |                     |                    |
|-----------|---------|---------------------|---------------------|--------------------|
|           |         | Disease             | Healthy             | Prevalence<br>0.29 |
| Predicted | Disease | 52                  | 32                  | PPV<br>0.62        |
|           | Healthy | 28                  | 167                 | NPV<br>0.86        |
|           |         | Sensitivity<br>0.65 | Specificity<br>0.84 | Accuracy<br>0.78   |

Using CA-125 alone

|           |         | Actual label        |                     |                    |
|-----------|---------|---------------------|---------------------|--------------------|
|           |         | Disease             | Healthy             | Prevalence<br>0.29 |
| Predicted | Disease | 62                  | 11                  | PPV<br>0.85        |
|           | Healthy | 18                  | 188                 | NPV<br>0.91        |
|           |         | Sensitivity<br>0.78 | Specificity<br>0.94 | Accuracy<br>0.9    |

Using four proteins

Table S24: Confusion matrices when applying SVM to identify the samples of ovarian cancer patients and healthy patients in data set 2 (C2 vs H2), using only CA-125 (left panel) and all four proteins (right panel). The samples from patients in late stage cancer and healthy patients in data set 1 (L1 vs H1) were used to train the model. This experiment is corresponding to experiment ID 6 in Table 3.

|           |         | Actual label        |                     |                    |
|-----------|---------|---------------------|---------------------|--------------------|
|           |         | Disease             | Healthy             | Prevalence<br>0.29 |
| Predicted | Disease | 47                  | 8                   | PPV<br>0.85        |
|           | Healthy | 33                  | 191                 | NPV<br>0.85        |
|           |         | Sensitivity<br>0.59 | Specificity<br>0.96 | Accuracy<br>0.85   |

Using CA-125 alone

|           |         | Actual label        |                     |                    |
|-----------|---------|---------------------|---------------------|--------------------|
|           |         | Disease             | Healthy             | Prevalence<br>0.29 |
| Predicted | Disease | 61                  | 8                   | PPV<br>0.88        |
|           | Healthy | 19                  | 191                 | NPV<br>0.91        |
|           |         | Sensitivity<br>0.76 | Specificity<br>0.96 | Accuracy<br>0.9    |

Using four proteins

Table S25: Confusion matrices when applying KNN to identify the samples of patients in early stage and healthy patients in data set 2 (E2 vs H2), using only CA-125 (left panel) and all four proteins (right panel). The samples from ovarian cancer patients and healthy patients in data set 1 (C1 vs H1) were used to train the model. This experiment is corresponding to experiment ID 7 in Table 3.

|           |         | Actual label |             | Prevalence<br>0.09 |
|-----------|---------|--------------|-------------|--------------------|
|           |         | Disease      | Healthy     |                    |
| Predicted | Disease | 15           | 135         | PPV<br>0.1         |
|           | Healthy | 4            | 64          | NPV<br>0.94        |
|           |         | Sensitivity  | Specificity | Accuracy           |
|           |         | 0.79         | 0.32        | 0.36               |

Using CA-125 alone

|           |         | Actual label |             | Prevalence<br>0.09 |
|-----------|---------|--------------|-------------|--------------------|
|           |         | Disease      | Healthy     |                    |
| Predicted | Disease | 16           | 46          | PPV<br>0.26        |
|           | Healthy | 3            | 153         | NPV<br>0.98        |
|           |         | Sensitivity  | Specificity | Accuracy           |
|           |         | 0.84         | 0.77        | 0.76               |

Using four proteins

Table S26: Confusion matrices when applying logistic regression to identify the samples of patients in early stage and healthy patients in data set 2 (E2 vs H2), using only CA-125 (left panel) and all four proteins (right panel). The samples from ovarian cancer patients and healthy patients in data set 1 (C1 vs H1) were used to train the model. This experiment is corresponding to experiment ID 7 in Table 3.

|           |         | Actual label |             | Prevalence<br>0.09 |
|-----------|---------|--------------|-------------|--------------------|
|           |         | Disease      | Healthy     |                    |
| Predicted | Disease | 14           | 105         | PPV<br>0.12        |
|           | Healthy | 5            | 94          | NPV<br>0.95        |
|           |         | Sensitivity  | Specificity | Accuracy           |
|           |         | 0.74         | 0.47        | 0.5                |

Using CA-125 alone

|           |         | Actual label |             | Prevalence<br>0.09 |
|-----------|---------|--------------|-------------|--------------------|
|           |         | Disease      | Healthy     |                    |
| Predicted | Disease | 17           | 53          | PPV<br>0.24        |
|           | Healthy | 2            | 146         | NPV<br>0.99        |
|           |         | Sensitivity  | Specificity | Accuracy           |
|           |         | 0.89         | 0.73        | 0.75               |

Using four proteins

Table S27: Confusion matrices when applying random forest to identify the samples of patients in early stage and healthy patients in data set 2 (E2 vs H2), using only CA-125 (left panel) and all four proteins (right panel). The samples from ovarian cancer patients and healthy patients in data set 1 (C1 vs H1) were used to train the model. This experiment is corresponding to experiment ID 7 in Table 3.

|           |         | Actual label |             | Prevalence<br>0.09 |
|-----------|---------|--------------|-------------|--------------------|
|           |         | Disease      | Healthy     |                    |
| Predicted | Disease | 12           | 89          | PPV<br>0.12        |
|           | Healthy | 7            | 110         | NPV<br>0.94        |
|           |         | Sensitivity  | Specificity | Accuracy           |
|           |         | 0.63         | 0.55        | 0.56               |

Using CA-125 alone

|           |         | Actual label |             | Prevalence<br>0.09 |
|-----------|---------|--------------|-------------|--------------------|
|           |         | Disease      | Healthy     |                    |
| Predicted | Disease | 17           | 113         | PPV<br>0.13        |
|           | Healthy | 2            | 86          | NPV<br>0.98        |
|           |         | Sensitivity  | Specificity | Accuracy           |
|           |         | 0.89         | 0.43        | 0.47               |

Using four proteins

Table S28: Confusion matrices when applying SVM to identify the samples of patients in early stage and healthy patients in data set 2 (E2 vs H2), using only CA-125 (left panel) and all four proteins (right panel). The samples from ovarian cancer patients and healthy patients in data set 1 (C1 vs H1) were used to train the model. This experiment is corresponding to experiment ID 7 in Table 3.

|           |         | Actual label        |                     |                    |
|-----------|---------|---------------------|---------------------|--------------------|
|           |         | Disease             | Healthy             | Prevalence<br>0.09 |
| Predicted | Disease | 13                  | 75                  | PPV<br>0.15        |
|           | Healthy | 6                   | 124                 | NPV<br>0.95        |
|           |         | Sensitivity<br>0.68 | Specificity<br>0.62 | Accuracy<br>0.63   |

Using CA-125 alone

|           |         | Actual label        |                     |                    |
|-----------|---------|---------------------|---------------------|--------------------|
|           |         | Disease             | Healthy             | Prevalence<br>0.09 |
| Predicted | Disease | 17                  | 108                 | PPV<br>0.14        |
|           | Healthy | 2                   | 91                  | NPV<br>0.98        |
|           |         | Sensitivity<br>0.89 | Specificity<br>0.46 | Accuracy<br>0.5    |

Using four proteins

Table S29: Confusion matrices when applying KNN to identify the samples of patients in late stage and healthy patients in data set 2 (L2 vs H2), using only CA-125 (left panel) and all four proteins (right panel). The samples from ovarian cancer patients and healthy patients in data set 1 (C1 vs H1) were used to train the model. This experiment is corresponding to experiment ID 8 in Table 3.

|           |         | Actual label        |                     |                    |
|-----------|---------|---------------------|---------------------|--------------------|
|           |         | Disease             | Healthy             | Prevalence<br>0.23 |
| Predicted | Disease | 44                  | 27                  | PPV<br>0.61        |
|           | Healthy | 17                  | 172                 | NPV<br>0.91        |
|           |         | Sensitivity<br>0.72 | Specificity<br>0.86 | Accuracy<br>0.83   |

Using CA-125 alone

|           |         | Actual label        |                     |                    |
|-----------|---------|---------------------|---------------------|--------------------|
|           |         | Disease             | Healthy             | Prevalence<br>0.23 |
| Predicted | Disease | 42                  | 6                   | PPV<br>0.88        |
|           | Healthy | 19                  | 193                 | NPV<br>0.91        |
|           |         | Sensitivity<br>0.69 | Specificity<br>0.97 | Accuracy<br>0.9    |

Using four proteins

Table S30: Confusion matrices when applying logistic regression to identify the samples of patients in late stage and healthy patients in data set 2 (L2 vs H2), using only CA-125 (left panel) and all four proteins (right panel). The samples from ovarian cancer patients and healthy patients in data set 1 (C1 vs H1) were used to train the model. This experiment is corresponding to experiment ID 8 in Table 3.

|           |         | Actual label        |                     |                    |
|-----------|---------|---------------------|---------------------|--------------------|
|           |         | Disease             | Healthy             | Prevalence<br>0.23 |
| Predicted | Disease | 41                  | 18                  | PPV<br>0.69        |
|           | Healthy | 20                  | 181                 | NPV<br>0.9         |
|           |         | Sensitivity<br>0.67 | Specificity<br>0.91 | Accuracy<br>0.85   |

Using CA-125 alone

|           |         | Actual label        |                     |                    |
|-----------|---------|---------------------|---------------------|--------------------|
|           |         | Disease             | Healthy             | Prevalence<br>0.23 |
| Predicted | Disease | 45                  | 12                  | PPV<br>0.79        |
|           | Healthy | 16                  | 187                 | NPV<br>0.92        |
|           |         | Sensitivity<br>0.74 | Specificity<br>0.94 | Accuracy<br>0.89   |

Using four proteins

Table S31: Confusion matrices when applying random forest to identify the samples of patients in late stage and healthy patients in data set 2 (L2 vs H2), using only CA-125 (left panel) and all four proteins (right panel). The samples from ovarian cancer patients and healthy patients in data set 1 (C1 vs H1) were used to train the model. This experiment is corresponding to experiment ID 8 in Table 3.

|           |         | Actual label        |                     |                    |
|-----------|---------|---------------------|---------------------|--------------------|
|           |         | Disease             | Healthy             | Prevalence<br>0.23 |
| Predicted | Disease | 41                  | 29                  | PPV<br>0.59        |
|           | Healthy | 20                  | 170                 | NPV<br>0.89        |
|           |         | Sensitivity<br>0.67 | Specificity<br>0.85 | Accuracy<br>0.81   |

Using CA-125 alone

|           |         | Actual label        |                     |                    |
|-----------|---------|---------------------|---------------------|--------------------|
|           |         | Disease             | Healthy             | Prevalence<br>0.23 |
| Predicted | Disease | 46                  | 11                  | PPV<br>0.81        |
|           | Healthy | 15                  | 188                 | NPV<br>0.93        |
|           |         | Sensitivity<br>0.75 | Specificity<br>0.94 | Accuracy<br>0.9    |

Using four proteins

Table S32: Confusion matrices when applying SVM to identify the samples of patients in late stage and healthy patients in data set 2 (L2 vs H2), using only CA-125 (left panel) and all four proteins (right panel). The samples from ovarian cancer patients and healthy patients in data set 1 (C1 vs H1) were used to train the model. This experiment is corresponding to experiment ID 8 in Table 3.

|           |         | Actual label        |                     |                    |
|-----------|---------|---------------------|---------------------|--------------------|
|           |         | Disease             | Healthy             | Prevalence<br>0.23 |
| Predicted | Disease | 39                  | 12                  | PPV<br>0.76        |
|           | Healthy | 22                  | 187                 | NPV<br>0.89        |
|           |         | Sensitivity<br>0.64 | Specificity<br>0.94 | Accuracy<br>0.87   |

Using CA-125 alone

|           |         | Actual label        |                     |                    |
|-----------|---------|---------------------|---------------------|--------------------|
|           |         | Disease             | Healthy             | Prevalence<br>0.23 |
| Predicted | Disease | 45                  | 11                  | PPV<br>0.8         |
|           | Healthy | 16                  | 188                 | NPV<br>0.92        |
|           |         | Sensitivity<br>0.74 | Specificity<br>0.94 | Accuracy<br>0.89   |

Using four proteins

Table S33: Confusion matrices when applying KNN to identify the samples of ovarian cancer patients and healthy patients in data set 2 (C2 vs H2), using only CA-125 (left panel) and all four proteins (right panel). The samples from ovarian cancer patients and healthy patients in data set 1 (C1 vs H1) were used to train the model. This experiment is corresponding to experiment ID 9 in Table 3.

|           |         | Actual label        |                     |                    |
|-----------|---------|---------------------|---------------------|--------------------|
|           |         | Disease             | Healthy             | Prevalence<br>0.29 |
| Predicted | Disease | 59                  | 35                  | PPV<br>0.63        |
|           | Healthy | 21                  | 164                 | NPV<br>0.89        |
|           |         | Sensitivity<br>0.74 | Specificity<br>0.82 | Accuracy<br>0.8    |

Using CA-125 alone

|           |         | Actual label        |                     |                    |
|-----------|---------|---------------------|---------------------|--------------------|
|           |         | Disease             | Healthy             | Prevalence<br>0.29 |
| Predicted | Disease | 58                  | 13                  | PPV<br>0.82        |
|           | Healthy | 22                  | 186                 | NPV<br>0.89        |
|           |         | Sensitivity<br>0.73 | Specificity<br>0.93 | Accuracy<br>0.87   |

Using four proteins

Table S34: Confusion matrices when applying logistic regression to identify the samples of ovarian cancer patients and healthy patients in data set 2 (C2 vs H2), using only CA-125 (left panel) and all four proteins (right panel). The samples from ovarian cancer patients and healthy patients in data set 1 (C1 vs H1) were used to train the model. This experiment is corresponding to experiment ID 9 in Table 3.

|           |         | Actual label |             |                    |
|-----------|---------|--------------|-------------|--------------------|
|           |         | Disease      | Healthy     | Prevalence<br>0.29 |
| Predicted | Disease | 56           | 27          | PPV<br>0.67        |
|           | Healthy | 24           | 172         | NPV<br>0.88        |
|           |         | Sensitivity  | Specificity | Accuracy           |
|           |         | 0.7          | 0.86        | 0.82               |

Using CA-125 alone

|           |         | Actual label |             |                    |
|-----------|---------|--------------|-------------|--------------------|
|           |         | Disease      | Healthy     | Prevalence<br>0.29 |
| Predicted | Disease | 61           | 12          | PPV<br>0.84        |
|           | Healthy | 19           | 187         | NPV<br>0.91        |
|           |         | Sensitivity  | Specificity | Accuracy           |
|           |         | 0.76         | 0.94        | 0.89               |

Using four proteins

Table S35: Confusion matrices when applying random forest to identify the samples of ovarian cancer patients and healthy patients in data set 2 (C2 vs H2), using only CA-125 (left panel) and all four proteins (right panel). The samples from ovarian cancer patients and healthy patients in data set 1 (C1 vs H1) were used to train the model. This experiment is corresponding to experiment ID 9 in Table 3.

|           |         | Actual label |             |                    |
|-----------|---------|--------------|-------------|--------------------|
|           |         | Disease      | Healthy     | Prevalence<br>0.29 |
| Predicted | Disease | 55           | 41          | PPV<br>0.57        |
|           | Healthy | 25           | 158         | NPV<br>0.86        |
|           |         | Sensitivity  | Specificity | Accuracy           |
|           |         | 0.69         | 0.79        | 0.76               |

Using CA-125 alone

|           |         | Actual label |             |                    |
|-----------|---------|--------------|-------------|--------------------|
|           |         | Disease      | Healthy     | Prevalence<br>0.29 |
| Predicted | Disease | 62           | 13          | PPV<br>0.83        |
|           | Healthy | 18           | 186         | NPV<br>0.91        |
|           |         | Sensitivity  | Specificity | Accuracy           |
|           |         | 0.78         | 0.93        | 0.89               |

Using four proteins

Table S36: Confusion matrices when applying SVM to identify the samples of ovarian cancer patients and healthy patients in data set 2 (C2 vs H2), using only CA-125 (left panel) and all four proteins (right panel). The samples from ovarian cancer patients and healthy patients in data set 1 (C1 vs H1) were used to train the model. This experiment is corresponding to experiment ID 9 in Table 3.

|           |         | Actual label |             |                    |
|-----------|---------|--------------|-------------|--------------------|
|           |         | Disease      | Healthy     | Prevalence<br>0.29 |
| Predicted | Disease | 51           | 14          | PPV<br>0.78        |
|           | Healthy | 29           | 185         | NPV<br>0.86        |
|           |         | Sensitivity  | Specificity | Accuracy           |
|           |         | 0.64         | 0.93        | 0.85               |

Using CA-125 alone

|           |         | Actual label |             |                    |
|-----------|---------|--------------|-------------|--------------------|
|           |         | Disease      | Healthy     | Prevalence<br>0.29 |
| Predicted | Disease | 62           | 11          | PPV<br>0.85        |
|           | Healthy | 18           | 188         | NPV<br>0.91        |
|           |         | Sensitivity  | Specificity | Accuracy           |
|           |         | 0.76         | 0.94        | 0.9                |

Using four proteins

Table S37: Confusion matrices when applying KNN to identify the samples of patients in early stage and healthy patients in data set 2 (E2 vs H2), using only CA-125 (left panel) and all four proteins (right panel). The samples from patients in early stage cancer and healthy patients in data set 2 (E2 vs E2) were used to train the model. Note that in this experiment the cohort of early stage cancer samples and healthy samples in data set 2 was divided into 60% for training and 40% for testing. This experiment is corresponding to experiment ID 9 in Table 3. This experiment is corresponding to experiment ID 10 in Table 3.

|           |         | Actual label |             |                    |
|-----------|---------|--------------|-------------|--------------------|
|           |         | Disease      | Healthy     | Prevalence<br>0.08 |
| Predicted | Disease | 1            | 2           | PPV<br>0.33        |
|           | Healthy | 6            | 77          | NPV<br>0.93        |
|           |         | Sensitivity  | Specificity | Accuracy           |
|           |         | 0.14         | 0.97        | 0.91               |

Using CA-125 alone

|           |         | Actual label |             |                    |
|-----------|---------|--------------|-------------|--------------------|
|           |         | Disease      | Healthy     | Prevalence<br>0.08 |
| Predicted | Disease | 2            | 1           | PPV<br>0.67        |
|           | Healthy | 5            | 78          | NPV<br>0.94        |
|           |         | Sensitivity  | Specificity | Accuracy           |
|           |         | 0.29         | 0.99        | 0.93               |

Using four proteins

Table S38: Confusion matrices when applying logistic regression to identify the samples of patients in early stage and healthy patients in data set 2 (E2 vs H2), using only CA-125 (left panel) and all four proteins (right panel). The samples from patients in early stage cancer and healthy patients in data set 2 (E2 vs E2) were used to train the model. Note that in this experiment the cohort of early stage cancer samples and healthy samples in data set 2 was divided into 60% for training and 40% for testing. This experiment is corresponding to experiment ID 10 in Table 3.

|           |         | Actual label |             |                    |
|-----------|---------|--------------|-------------|--------------------|
|           |         | Disease      | Healthy     | Prevalence<br>0.08 |
| Predicted | Disease | 1            | 2           | PPV<br>0.33        |
|           | Healthy | 6            | 77          | NPV<br>0.93        |
|           |         | Sensitivity  | Specificity | Accuracy           |
|           |         | 0.14         | 0.97        | 0.91               |

Using CA-125 alone

|           |         | Actual label |             |                    |
|-----------|---------|--------------|-------------|--------------------|
|           |         | Disease      | Healthy     | Prevalence<br>0.08 |
| Predicted | Disease | 4            | 1           | PPV<br>0.8         |
|           | Healthy | 3            | 78          | NPV<br>0.96        |
|           |         | Sensitivity  | Specificity | Accuracy           |
|           |         | 0.57         | 0.99        | 0.95               |

Using four proteins

Table S39: Confusion matrices when applying random forest to identify the samples of patients in early stage and healthy patients in data set 2 (E2 vs H2), using only CA-125 (left panel) and all four proteins (right panel). The samples from patients in early stage cancer and healthy patients in data set 2 (E2 vs E2) were used to train the model. Note that in this experiment the cohort of early stage cancer samples and healthy samples in data set 2 was divided into 60% for training and 40% for testing. This experiment is corresponding to experiment ID 10 in Table 3.

|           |         | Actual label |             |                    |
|-----------|---------|--------------|-------------|--------------------|
|           |         | Disease      | Healthy     | Prevalence<br>0.08 |
| Predicted | Disease | 1            | 5           | PPV<br>0.17        |
|           | Healthy | 6            | 74          | NPV<br>0.93        |
|           |         | Sensitivity  | Specificity | Accuracy           |
|           |         | 0.14         | 0.94        | 0.87               |

Using CA-125 alone

|           |         | Actual label |             |                    |
|-----------|---------|--------------|-------------|--------------------|
|           |         | Disease      | Healthy     | Prevalence<br>0.08 |
| Predicted | Disease | 3            | 2           | PPV<br>0.6         |
|           | Healthy | 4            | 77          | NPV<br>0.95        |
|           |         | Sensitivity  | Specificity | Accuracy           |
|           |         | 0.43         | 0.97        | 0.93               |

Using four proteins

Table S40: Confusion matrices when applying SVM to identify the samples of patients in early stage and healthy patients in data set 2 (E2 vs H2), using only CA-125 (left panel) and all four proteins (right panel). The samples from patients in early stage cancer and healthy patients in data set 2 (E2 vs E2) were used to train the model. Note that in this experiment the cohort of early stage cancer samples and healthy samples in data set 2 was divided into 60% for training and 40% for testing. This experiment is corresponding to experiment ID 10 in Table 3.

|           |         | Actual label        |                     |                    |
|-----------|---------|---------------------|---------------------|--------------------|
|           |         | Disease             | Healthy             | Prevalence<br>0.08 |
| Predicted | Disease | 1                   | 2                   | PPV<br>0.33        |
|           | Healthy | 6                   | 77                  | NPV<br>0.93        |
|           |         | Sensitivity<br>0.14 | Specificity<br>0.97 | Accuracy<br>0.91   |

Using CA-125 alone

|           |         | Actual label        |                     |                    |
|-----------|---------|---------------------|---------------------|--------------------|
|           |         | Disease             | Healthy             | Prevalence<br>0.08 |
| Predicted | Disease | 2                   | 1                   | PPV<br>0.67        |
|           | Healthy | 5                   | 78                  | NPV<br>0.94        |
|           |         | Sensitivity<br>0.29 | Specificity<br>0.99 | Accuracy<br>0.93   |

Using four proteins

Table S41: Confusion matrices when applying KNN to identify the samples of patients in early stage and healthy patients in data set 1 (E1 vs H1), using only CA-125 (left panel) and all four proteins (right panel). The samples from patients in early stage cancer and healthy patients in data set 2 (E2 vs E2) were used to train the model. This experiment is corresponding to experiment ID 11 in Table 3.

|           |         | Actual label        |                     |                    |
|-----------|---------|---------------------|---------------------|--------------------|
|           |         | Disease             | Healthy             | Prevalence<br>0.18 |
| Predicted | Disease | 5                   | 1                   | PPV<br>0.83        |
|           | Healthy | 13                  | 79                  | NPV<br>0.86        |
|           |         | Sensitivity<br>0.28 | Specificity<br>0.99 | Accuracy<br>0.86   |

Using CA-125 alone

|           |         | Actual label        |                  |                    |
|-----------|---------|---------------------|------------------|--------------------|
|           |         | Disease             | Healthy          | Prevalence<br>0.18 |
| Predicted | Disease | 12                  | 0                | PPV<br>1           |
|           | Healthy | 6                   | 80               | NPV<br>0.93        |
|           |         | Sensitivity<br>0.67 | Specificity<br>1 | Accuracy<br>0.94   |

Using four proteins

Table S42: Confusion matrices when applying logistic regression to identify the samples of patients in early stage and healthy patients in data set 1 (E1 vs H1), using only CA-125 (left panel) and all four proteins (right panel). The samples from patients in early stage cancer and healthy patients in data set 2 (E2 vs E2) were used to train the model. This experiment is corresponding to experiment ID 11 in Table 3.

|           |         | Actual label        |                  |                    |
|-----------|---------|---------------------|------------------|--------------------|
|           |         | Disease             | Healthy          | Prevalence<br>0.18 |
| Predicted | Disease | 4                   | 0                | PPV<br>1           |
|           | Healthy | 14                  | 80               | NPV<br>0.85        |
|           |         | Sensitivity<br>0.22 | Specificity<br>1 | Accuracy<br>0.86   |

Using CA-125 alone

|           |         | Actual label        |                  |                    |
|-----------|---------|---------------------|------------------|--------------------|
|           |         | Disease             | Healthy          | Prevalence<br>0.18 |
| Predicted | Disease | 15                  | 0                | PPV<br>1           |
|           | Healthy | 3                   | 80               | NPV<br>0.96        |
|           |         | Sensitivity<br>0.83 | Specificity<br>1 | Accuracy<br>0.97   |

Using four proteins

Table S43: Confusion matrices when applying random forest to identify the samples of patients in early stage and healthy patients in data set 1 (E1 vs H1), using only CA-125 (left panel) and all four proteins (right panel). The samples from patients in early stage cancer and healthy patients in data set 2 (E2 vs E2) were used to train the model. This experiment is corresponding to experiment ID 11 in Table 3.

|           |         | Actual label |             |                    |
|-----------|---------|--------------|-------------|--------------------|
|           |         | Disease      | Healthy     | Prevalence<br>0.18 |
| Predicted | Disease | 6            | 4           | PPV<br>0.6         |
|           | Healthy | 12           | 76          | NPV<br>0.86        |
|           |         | Sensitivity  | Specificity | Accuracy           |
|           |         | 0.33         | 0.95        | 0.84               |

Using CA-125 alone

|           |         | Actual label |             |                    |
|-----------|---------|--------------|-------------|--------------------|
|           |         | Disease      | Healthy     | Prevalence<br>0.18 |
| Predicted | Disease | 16           | 0           | PPV<br>1           |
|           | Healthy | 2            | 80          | NPV<br>0.98        |
|           |         | Sensitivity  | Specificity | Accuracy           |
|           |         | 0.89         | 1           | 0.98               |

Using four proteins

Table S44: Confusion matrices when applying SVM to identify the samples of patients in early stage and healthy patients in data set 1 (E1 vs H1), using only CA-125 (left panel) and all four proteins (right panel). The samples from patients in early stage cancer and healthy patients in data set 2 (E2 vs E2) were used to train the model. This experiment is corresponding to experiment ID 11 in Table 3.

|           |         | Actual label |             |                    |
|-----------|---------|--------------|-------------|--------------------|
|           |         | Disease      | Healthy     | Prevalence<br>0.18 |
| Predicted | Disease | 4            | 0           | PPV<br>1           |
|           | Healthy | 14           | 80          | NPV<br>0.85        |
|           |         | Sensitivity  | Specificity | Accuracy           |
|           |         | 0.22         | 1           | 0.86               |

Using CA-125 alone

|           |         | Actual label |             |                    |
|-----------|---------|--------------|-------------|--------------------|
|           |         | Disease      | Healthy     | Prevalence<br>0.18 |
| Predicted | Disease | 15           | 0           | PPV<br>1           |
|           | Healthy | 3            | 80          | NPV<br>0.96        |
|           |         | Sensitivity  | Specificity | Accuracy           |
|           |         | 0.83         | 1           | 0.97               |

Using four proteins

Table S45: Confusion matrices when applying KNN to identify the samples of ovarian cancer patients and healthy patients in data set 1 (C1 vs H1), using only CA-125 (left panel) and all four proteins (right panel). The samples from patients in early stage cancer and healthy patients in data set 2 (E2 vs E2) were used to train the model. This experiment is corresponding to experiment ID 12 in Table 3.

|           |         | Actual label |             |                    |
|-----------|---------|--------------|-------------|--------------------|
|           |         | Disease      | Healthy     | Prevalence<br>0.48 |
| Predicted | Disease | 28           | 1           | PPV<br>0.97        |
|           | Healthy | 45           | 79          | NPV<br>0.64        |
|           |         | Sensitivity  | Specificity | Accuracy           |
|           |         | 0.38         | 0.99        | 0.7                |

Using CA-125 alone

|           |         | Actual label |             |                    |
|-----------|---------|--------------|-------------|--------------------|
|           |         | Disease      | Healthy     | Prevalence<br>0.48 |
| Predicted | Disease | 24           | 0           | PPV<br>1           |
|           | Healthy | 49           | 80          | NPV<br>0.62        |
|           |         | Sensitivity  | Specificity | Accuracy           |
|           |         | 0.33         | 1           | 0.68               |

Using four proteins

Table S46: Confusion matrices when applying logistic regression to identify the samples of ovarian cancer patients and healthy patients in data set 1 (C1 vs H1), using only CA-125 (left panel) and all four proteins (right panel). The samples from patients in early stage cancer and healthy patients in data set 2 (E2 vs E2) were used to train the model. This experiment is corresponding to experiment ID 12 in Table 3.

|           |         | Actual label |             |                    |
|-----------|---------|--------------|-------------|--------------------|
|           |         | Disease      | Healthy     | Prevalence<br>0.48 |
| Predicted | Disease | 26           | 0           | PPV<br>1           |
|           | Healthy | 47           | 80          | NPV<br>0.63        |
|           |         | Sensitivity  | Specificity | Accuracy           |
|           |         | 0.36         | 1           | 0.69               |

Using CA-125 alone

|           |         | Actual label |             |                    |
|-----------|---------|--------------|-------------|--------------------|
|           |         | Disease      | Healthy     | Prevalence<br>0.48 |
| Predicted | Disease | 38           | 0           | PPV<br>1           |
|           | Healthy | 35           | 80          | NPV<br>0.7         |
|           |         | Sensitivity  | Specificity | Accuracy           |
|           |         | 0.52         | 1           | 0.77               |

Using four proteins

Table S47: Confusion matrices when applying random forest to identify the samples of ovarian cancer patients and healthy patients in data set 1 (C1 vs H1), using only CA-125 (left panel) and all four proteins (right panel). The samples from patients in early stage cancer and healthy patients in data set 2 (E2 vs E2) were used to train the model. This experiment is corresponding to experiment ID 12 in Table 3.

|           |         | Actual label |             |                    |
|-----------|---------|--------------|-------------|--------------------|
|           |         | Disease      | Healthy     | Prevalence<br>0.48 |
| Predicted | Disease | 31           | 3           | PPV<br>0.91        |
|           | Healthy | 42           | 77          | NPV<br>0.65        |
|           |         | Sensitivity  | Specificity | Accuracy           |
|           |         | 0.42         | 0.96        | 0.71               |

Using CA-125 alone

|           |         | Actual label |             |                    |
|-----------|---------|--------------|-------------|--------------------|
|           |         | Disease      | Healthy     | Prevalence<br>0.48 |
| Predicted | Disease | 42           | 0           | PPV<br>1           |
|           | Healthy | 31           | 80          | NPV<br>0.72        |
|           |         | Sensitivity  | Specificity | Accuracy           |
|           |         | 0.58         | 1           | 0.8                |

Using four proteins

Table S48: Confusion matrices when applying SVM to identify the samples of ovarian cancer patients and healthy patients in data set 1 (C1 vs H1), using only CA-125 (left panel) and all four proteins (right panel). The samples from patients in early stage cancer and healthy patients in data set 2 (E2 vs E2) were used to train the model. This experiment is corresponding to experiment ID 12 in Table 3.

|           |         | Actual label |             |                    |
|-----------|---------|--------------|-------------|--------------------|
|           |         | Disease      | Healthy     | Prevalence<br>0.48 |
| Predicted | Disease | 27           | 0           | PPV<br>1           |
|           | Healthy | 46           | 80          | NPV<br>0.63        |
|           |         | Sensitivity  | Specificity | Accuracy           |
|           |         | 0.37         | 1           | 0.7                |

Using CA-125 alone

|           |         | Actual label |             |                    |
|-----------|---------|--------------|-------------|--------------------|
|           |         | Disease      | Healthy     | Prevalence<br>0.48 |
| Predicted | Disease | 50           | 0           | PPV<br>1           |
|           | Healthy | 23           | 80          | NPV<br>0.78        |
|           |         | Sensitivity  | Specificity | Accuracy           |
|           |         | 0.68         | 1           | 0.85               |

Using four proteins

Table S49: Confusion matrices when applying KNN to identify the samples of patients in late stage and healthy patients in data set 2 (L2 vs H2), using only CA-125 (left panel) and all four proteins (right panel). The samples from patients in late stage cancer and healthy patients in data set 2 (L2 vs L2) were used to train the model. Note that in this experiment the cohort of late stage cancer samples and healthy samples in data set 2 was divided into 60% for training and 40% for testing. This experiment is corresponding to experiment ID 13 in Table 3.

|           |         | Actual label |             |                    |
|-----------|---------|--------------|-------------|--------------------|
|           |         | Disease      | Healthy     | Prevalence<br>0.23 |
| Predicted | Disease | 13           | 2           | PPV<br>0.87        |
|           | Healthy | 11           | 77          | NPV<br>0.88        |
|           |         | Sensitivity  | Specificity | Accuracy           |
|           |         | 0.54         | 0.97        | 0.87               |

Using CA-125 alone

|           |         | Actual label |             |                    |
|-----------|---------|--------------|-------------|--------------------|
|           |         | Disease      | Healthy     | Prevalence<br>0.23 |
| Predicted | Disease | 16           | 1           | PPV<br>0.94        |
|           | Healthy | 8            | 78          | NPV<br>0.91        |
|           |         | Sensitivity  | Specificity | Accuracy           |
|           |         | 0.67         | 0.98        | 0.91               |

Using four proteins

Table S50: Confusion matrices when applying logistic regression to identify the samples of patients in late stage and healthy patients in data set 2 (L2 vs H2), using only CA-125 (left panel) and all four proteins (right panel). The samples from patients in late stage cancer and healthy patients in data set 2 (L2 vs L2) were used to train the model. Note that in this experiment the cohort of late stage cancer samples and healthy samples in data set 2 was divided into 60% for training and 40% for testing. This experiment is corresponding to experiment ID 13 in Table 3.

|           |         | Actual label |             |                    |
|-----------|---------|--------------|-------------|--------------------|
|           |         | Disease      | Healthy     | Prevalence<br>0.23 |
| Predicted | Disease | 11           | 2           | PPV<br>0.85        |
|           | Healthy | 13           | 77          | NPV<br>0.86        |
|           |         | Sensitivity  | Specificity | Accuracy           |
|           |         | 0.46         | 0.97        | 0.85               |

Using CA-125 alone

|           |         | Actual label |             |                    |
|-----------|---------|--------------|-------------|--------------------|
|           |         | Disease      | Healthy     | Prevalence<br>0.23 |
| Predicted | Disease | 16           | 2           | PPV<br>0.89        |
|           | Healthy | 8            | 77          | NPV<br>0.91        |
|           |         | Sensitivity  | Specificity | Accuracy           |
|           |         | 0.67         | 0.97        | 0.9                |

Using four proteins

Table S51: Confusion matrices when applying random forest to identify the samples of patients in late stage and healthy patients in data set 2 (L2 vs H2), using only CA-125 (left panel) and all four proteins (right panel). The samples from patients in late stage cancer and healthy patients in data set 2 (L2 vs L2) were used to train the model. Note that in this experiment the cohort of late stage cancer samples and healthy samples in data set 2 was divided into 60% for training and 40% for testing. This experiment is corresponding to experiment ID 13 in Table 3.

|           |         | Actual label |             |                    |
|-----------|---------|--------------|-------------|--------------------|
|           |         | Disease      | Healthy     | Prevalence<br>0.23 |
| Predicted | Disease | 14           | 10          | PPV<br>0.58        |
|           | Healthy | 10           | 69          | NPV<br>0.87        |
|           |         | Sensitivity  | Specificity | Accuracy           |
|           |         | 0.58         | 0.87        | 0.81               |

Using CA-125 alone

|           |         | Actual label |             |                    |
|-----------|---------|--------------|-------------|--------------------|
|           |         | Disease      | Healthy     | Prevalence<br>0.23 |
| Predicted | Disease | 17           | 3           | PPV<br>0.85        |
|           | Healthy | 7            | 76          | NPV<br>0.92        |
|           |         | Sensitivity  | Specificity | Accuracy           |
|           |         | 0.71         | 0.96        | 0.9                |

Using four proteins

Table S52: Confusion matrices when applying SVM to identify the samples of patients in late stage and healthy patients in data set 2 (L2 vs H2), using only CA-125 (left panel) and all four proteins (right panel). The samples from patients in late stage cancer and healthy patients in data set 2 (L2 vs L2) were used to train the model. Note that in this experiment the cohort of late stage cancer samples and healthy samples in data set 2 was divided into 60% for training and 40% for testing. This experiment is corresponding to experiment ID 13 in Table 3.

|           |         | Actual label        |                     |                    |
|-----------|---------|---------------------|---------------------|--------------------|
|           |         | Disease             | Healthy             | Prevalence<br>0.23 |
| Predicted | Disease | 11                  | 2                   | PPV<br>0.85        |
|           | Healthy | 13                  | 77                  | NPV<br>0.86        |
|           |         | Sensitivity<br>0.46 | Specificity<br>0.97 | Accuracy<br>0.85   |

Using CA-125 alone

|           |         | Actual label        |                     |                    |
|-----------|---------|---------------------|---------------------|--------------------|
|           |         | Disease             | Healthy             | Prevalence<br>0.23 |
| Predicted | Disease | 16                  | 1                   | PPV<br>0.94        |
|           | Healthy | 8                   | 78                  | NPV<br>0.91        |
|           |         | Sensitivity<br>0.67 | Specificity<br>0.99 | Accuracy<br>0.91   |

Using four proteins

Table S53: Confusion matrices when applying KNN to identify the samples of patients in late stage and healthy patients in data set 1 (L1 vs H1), using only CA-125 (left panel) and all four proteins (right panel). The samples from patients in late stage cancer and healthy patients in data set 2 (L2 vs L2) were used to train the model. This experiment is corresponding to experiment ID 14 in Table 3.

|           |         | Actual label        |                  |                    |
|-----------|---------|---------------------|------------------|--------------------|
|           |         | Disease             | Healthy          | Prevalence<br>0.41 |
| Predicted | Disease | 43                  | 0                | PPV<br>1           |
|           | Healthy | 12                  | 80               | NPV<br>0.87        |
|           |         | Sensitivity<br>0.78 | Specificity<br>1 | Accuracy<br>0.91   |

Using CA-125 alone

|           |         | Actual label        |                     |                    |
|-----------|---------|---------------------|---------------------|--------------------|
|           |         | Disease             | Healthy             | Prevalence<br>0.41 |
| Predicted | Disease | 49                  | 1                   | PPV<br>0.98        |
|           | Healthy | 6                   | 79                  | NPV<br>0.93        |
|           |         | Sensitivity<br>0.89 | Specificity<br>0.99 | Accuracy<br>0.95   |

Using four proteins

Table S54: Confusion matrices when applying logistic regression to identify the samples of patients in late stage and healthy patients in data set 1 (L1 vs H1), using only CA-125 (left panel) and all four proteins (right panel). The samples from patients in late stage cancer and healthy patients in data set 2 (L2 vs L2) were used to train the model. This experiment is corresponding to experiment ID 14 in Table 3.

|           |         | Actual label        |                  |                    |
|-----------|---------|---------------------|------------------|--------------------|
|           |         | Disease             | Healthy          | Prevalence<br>0.41 |
| Predicted | Disease | 42                  | 0                | PPV<br>1           |
|           | Healthy | 13                  | 80               | NPV<br>0.86        |
|           |         | Sensitivity<br>0.76 | Specificity<br>1 | Accuracy<br>0.9    |

Using CA-125 alone

|           |         | Actual label        |                  |                    |
|-----------|---------|---------------------|------------------|--------------------|
|           |         | Disease             | Healthy          | Prevalence<br>0.41 |
| Predicted | Disease | 48                  | 0                | PPV<br>1           |
|           | Healthy | 7                   | 80               | NPV<br>0.92        |
|           |         | Sensitivity<br>0.87 | Specificity<br>1 | Accuracy<br>0.95   |

Using four proteins

Table S55: Confusion matrices when applying random forest to identify the samples of patients in late stage and healthy patients in data set 1 (L1 vs H1), using only CA-125 (left panel) and all four proteins (right panel). The samples from patients in late stage cancer and healthy patients in data set 2 (L2 vs L2) were used to train the model. This experiment is corresponding to experiment ID 14 in Table 3.

|           |         | Actual label        |                     |                    |
|-----------|---------|---------------------|---------------------|--------------------|
|           |         | Disease             | Healthy             | Prevalence<br>0.41 |
| Predicted | Disease | 42                  | 11                  | PPV<br>0.79        |
|           | Healthy | 13                  | 69                  | NPV<br>0.84        |
|           |         | Sensitivity<br>0.76 | Specificity<br>0.86 | Accuracy<br>0.82   |

Using CA-125 alone

|           |         | Actual label        |                     |                    |
|-----------|---------|---------------------|---------------------|--------------------|
|           |         | Disease             | Healthy             | Prevalence<br>0.41 |
| Predicted | Disease | 52                  | 9                   | PPV<br>0.85        |
|           | Healthy | 3                   | 71                  | NPV<br>0.96        |
|           |         | Sensitivity<br>0.95 | Specificity<br>0.89 | Accuracy<br>0.91   |

Using four proteins

Table S56: Confusion matrices when applying SVM to identify the samples of patients in late stage and healthy patients in data set 1 (L1 vs H1), using only CA-125 (left panel) and all four proteins (right panel). The samples from patients in late stage cancer and healthy patients in data set 2 (L2 vs L2) were used to train the model. This experiment is corresponding to experiment ID 14 in Table 3.

|           |         | Actual label        |                  |                    |
|-----------|---------|---------------------|------------------|--------------------|
|           |         | Disease             | Healthy          | Prevalence<br>0.41 |
| Predicted | Disease | 42                  | 0                | PPV<br>1           |
|           | Healthy | 13                  | 80               | NPV<br>0.86        |
|           |         | Sensitivity<br>0.76 | Specificity<br>1 | Accuracy<br>0.9    |

Using CA-125 alone

|           |         | Actual label        |                  |                    |
|-----------|---------|---------------------|------------------|--------------------|
|           |         | Disease             | Healthy          | Prevalence<br>0.41 |
| Predicted | Disease | 48                  | 0                | PPV<br>1           |
|           | Healthy | 7                   | 80               | NPV<br>0.92        |
|           |         | Sensitivity<br>0.87 | Specificity<br>1 | Accuracy<br>0.95   |

Using four proteins

Table S57: Confusion matrices when applying KNN to identify the samples of ovarian cancer patients and healthy patients in data set 1 (C1 vs H1), using only CA-125 (left panel) and all four proteins (right panel). The samples from patients in late stage cancer and healthy patients in data set 2 (L2 vs L2) were used to train the model. This experiment is corresponding to experiment ID 15 in Table 3.

|           |         | Actual label        |                  |                    |
|-----------|---------|---------------------|------------------|--------------------|
|           |         | Disease             | Healthy          | Prevalence<br>0.48 |
| Predicted | Disease | 53                  | 0                | PPV<br>1           |
|           | Healthy | 20                  | 80               | NPV<br>0.8         |
|           |         | Sensitivity<br>0.73 | Specificity<br>1 | Accuracy<br>0.87   |

Using CA-125 alone

|           |         | Actual label        |                     |                    |
|-----------|---------|---------------------|---------------------|--------------------|
|           |         | Disease             | Healthy             | Prevalence<br>0.48 |
| Predicted | Disease | 65                  | 4                   | PPV<br>0.94        |
|           | Healthy | 8                   | 76                  | NPV<br>0.9         |
|           |         | Sensitivity<br>0.89 | Specificity<br>0.95 | Accuracy<br>0.92   |

Using four proteins

Table S58: Confusion matrices when applying logistic regression to identify the samples of ovarian cancer patients and healthy patients in data set 1 (C1 vs H1), using only CA-125 (left panel) and all four proteins (right panel). The samples from patients in late stage cancer and healthy patients in data set 2 (L2 vs L2) were used to train the model. This experiment is corresponding to experiment ID 15 in Table 3.

|           |         | Actual label       |                  |                    |
|-----------|---------|--------------------|------------------|--------------------|
|           |         | Disease            | Healthy          | Prevalence<br>0.48 |
| Predicted | Disease | 51                 | 0                | PPV<br>1           |
|           | Healthy | 22                 | 80               | NPV<br>0.78        |
|           |         | Sensitivity<br>0.7 | Specificity<br>1 | Accuracy<br>0.86   |

Using CA-125 alone

|           |         | Actual label        |                  |                    |
|-----------|---------|---------------------|------------------|--------------------|
|           |         | Disease             | Healthy          | Prevalence<br>0.48 |
| Predicted | Disease | 59                  | 0                | PPV<br>1           |
|           | Healthy | 14                  | 80               | NPV<br>0.85        |
|           |         | Sensitivity<br>0.81 | Specificity<br>1 | Accuracy<br>0.91   |

Using four proteins

Table S59: Confusion matrices when applying random forest to identify the samples of ovarian cancer patients and healthy patients in data set 1 (C1 vs H1), using only CA-125 (left panel) and all four proteins (right panel). The samples from patients in late stage cancer and healthy patients in data set 2 (L2 vs L2) were used to train the model. This experiment is corresponding to experiment ID 15 in Table 3.

|           |         | Actual label        |                     |                    |
|-----------|---------|---------------------|---------------------|--------------------|
|           |         | Disease             | Healthy             | Prevalence<br>0.48 |
| Predicted | Disease | 52                  | 11                  | PPV<br>0.83        |
|           | Healthy | 21                  | 69                  | NPV<br>0.77        |
|           |         | Sensitivity<br>0.71 | Specificity<br>0.86 | Accuracy<br>0.79   |

Using CA-125 alone

|           |         | Actual label        |                     |                    |
|-----------|---------|---------------------|---------------------|--------------------|
|           |         | Disease             | Healthy             | Prevalence<br>0.48 |
| Predicted | Disease | 68                  | 10                  | PPV<br>0.87        |
|           | Healthy | 5                   | 70                  | NPV<br>0.93        |
|           |         | Sensitivity<br>0.93 | Specificity<br>0.88 | Accuracy<br>0.9    |

Using four proteins

Table S60: Confusion matrices when applying SVM to identify the samples of ovarian cancer patients and healthy patients in data set 1 (C1 vs H1), using only CA-125 (left panel) and all four proteins (right panel). The samples from patients in late stage cancer and healthy patients in data set 2 (L2 vs L2) were used to train the model. This experiment is corresponding to experiment ID 15 in Table 3.

|           |         | Actual label        |                  |                    |
|-----------|---------|---------------------|------------------|--------------------|
|           |         | Disease             | Healthy          | Prevalence<br>0.48 |
| Predicted | Disease | 50                  | 0                | PPV<br>1           |
|           | Healthy | 23                  | 80               | NPV<br>0.78        |
|           |         | Sensitivity<br>0.68 | Specificity<br>1 | Accuracy<br>0.85   |

Using CA-125 alone

|           |         | Actual label        |                  |                    |
|-----------|---------|---------------------|------------------|--------------------|
|           |         | Disease             | Healthy          | Prevalence<br>0.48 |
| Predicted | Disease | 63                  | 0                | PPV<br>1           |
|           | Healthy | 10                  | 80               | NPV<br>0.89        |
|           |         | Sensitivity<br>0.86 | Specificity<br>1 | Accuracy<br>0.93   |

Using four proteins

Table S61: Confusion matrices when applying KNN to identify the samples of patients in early stage and healthy patients in data set 1 (E1 vs H1), using only CA-125 (left panel) and all four proteins (right panel). The samples from ovarian cancer patients and healthy patients in data set 2 (C2 vs H2) were used to train the model. This experiment is corresponding to experiment ID 16 in Table 3.

|           |         | Actual label |             |                    |
|-----------|---------|--------------|-------------|--------------------|
|           |         | Disease      | Healthy     | Prevalence<br>0.18 |
| Predicted | Disease | 12           | 2           | PPV<br>0.86        |
|           | Healthy | 6            | 78          | NPV<br>0.93        |
|           |         | Sensitivity  | Specificity | Accuracy           |
|           |         | 0.67         | 0.85        | 0.93               |

Using CA-125 alone

|           |         | Actual label |             |                    |
|-----------|---------|--------------|-------------|--------------------|
|           |         | Disease      | Healthy     | Prevalence<br>0.18 |
| Predicted | Disease | 17           | 12          | PPV<br>0.59        |
|           | Healthy | 1            | 68          | NPV<br>0.99        |
|           |         | Sensitivity  | Specificity | Accuracy           |
|           |         | 0.94         | 0.85        | 0.87               |

Using four proteins

Table S62: Confusion matrices when applying logistic regression to identify the samples of patients in early stage and healthy patients in data set 1 (E1 vs H1), using only CA-125 (left panel) and all four proteins (right panel). The samples from ovarian cancer patients and healthy patients in data set 2 (C2 vs H2) were used to train the model. This experiment is corresponding to experiment ID 16 in Table 3.

|           |         | Actual label |             |                    |
|-----------|---------|--------------|-------------|--------------------|
|           |         | Disease      | Healthy     | Prevalence<br>0.18 |
| Predicted | Disease | 11           | 1           | PPV<br>0.92        |
|           | Healthy | 7            | 79          | NPV<br>0.92        |
|           |         | Sensitivity  | Specificity | Accuracy           |
|           |         | 0.61         | 0.99        | 0.92               |

Using CA-125 alone

|           |         | Actual label |             |                    |
|-----------|---------|--------------|-------------|--------------------|
|           |         | Disease      | Healthy     | Prevalence<br>0.18 |
| Predicted | Disease | 17           | 7           | PPV<br>0.71        |
|           | Healthy | 1            | 73          | NPV<br>0.99        |
|           |         | Sensitivity  | Specificity | Accuracy           |
|           |         | 0.94         | 0.91        | 0.92               |

Using four proteins

Table S63: Confusion matrices when applying random forest to identify the samples of patients in early stage and healthy patients in data set 1 (E1 vs H1), using only CA-125 (left panel) and all four proteins (right panel). The samples from ovarian cancer patients and healthy patients in data set 2 (C2 vs H2) were used to train the model. This experiment is corresponding to experiment ID 16 in Table 3.

|           |         | Actual label |             |                    |
|-----------|---------|--------------|-------------|--------------------|
|           |         | Disease      | Healthy     | Prevalence<br>0.18 |
| Predicted | Disease | 13           | 19          | PPV<br>0.41        |
|           | Healthy | 5            | 61          | NPV<br>0.92        |
|           |         | Sensitivity  | Specificity | Accuracy           |
|           |         | 0.72         | 0.76        | 0.76               |

Using CA-125 alone

|           |         | Actual label |             |                    |
|-----------|---------|--------------|-------------|--------------------|
|           |         | Disease      | Healthy     | Prevalence<br>0.18 |
| Predicted | Disease | 17           | 35          | PPV<br>0.33        |
|           | Healthy | 1            | 45          | NPV<br>0.98        |
|           |         | Sensitivity  | Specificity | Accuracy           |
|           |         | 0.94         | 0.56        | 0.63               |

Using four proteins

Table S64: Confusion matrices when applying SVM to identify the samples of patients in early stage and healthy patients in data set 1 (E1 vs H1), using only CA-125 (left panel) and all four proteins (right panel). The samples from ovarian cancer patients and healthy patients in data set 2 (C2 vs H2) were used to train the model. This experiment is corresponding to experiment ID 16 in Table 3.

|           |         | Actual label |             |                    |
|-----------|---------|--------------|-------------|--------------------|
|           |         | Disease      | Healthy     | Prevalence<br>0.18 |
| Predicted | Disease | 10           | 0           | PPV<br>1           |
|           | Healthy | 8            | 80          | NPV<br>0.91        |
|           |         | Sensitivity  | Specificity | Accuracy           |
|           |         | 0.56         | 1           | 0.92               |

Using CA-125 alone

|           |         | Actual label |             |                    |
|-----------|---------|--------------|-------------|--------------------|
|           |         | Disease      | Healthy     | Prevalence<br>0.18 |
| Predicted | Disease | 17           | 9           | PPV<br>0.65        |
|           | Healthy | 1            | 71          | NPV<br>0.99        |
|           |         | Sensitivity  | Specificity | Accuracy           |
|           |         | 0.94         | 0.89        | 0.9                |

Using four proteins

Table S65: Confusion matrices when applying KNN to identify the samples of patients in late stage and healthy patients in data set 1 (L1 vs H1), using only CA-125 (left panel) and all four proteins (right panel). The samples from ovarian cancer patients and healthy patients in data set 2 (C2 vs H2) were used to train the model. This experiment is corresponding to experiment ID 17 in Table 3.

|           |         | Actual label |             |                    |
|-----------|---------|--------------|-------------|--------------------|
|           |         | Disease      | Healthy     | Prevalence<br>0.41 |
| Predicted | Disease | 42           | 0           | PPV<br>1           |
|           | Healthy | 13           | 80          | NPV<br>0.86        |
|           |         | Sensitivity  | Specificity | Accuracy           |
|           |         | 0.76         | 1           | 0.9                |

Using CA-125 alone

|           |         | Actual label |             |                    |
|-----------|---------|--------------|-------------|--------------------|
|           |         | Disease      | Healthy     | Prevalence<br>0.41 |
| Predicted | Disease | 48           | 2           | PPV<br>0.96        |
|           | Healthy | 7            | 78          | NPV<br>0.92        |
|           |         | Sensitivity  | Specificity | Accuracy           |
|           |         | 0.87         | 0.98        | 0.93               |

Using four proteins

Table S66: Confusion matrices when applying logistic regression to identify the samples of patients in late stage and healthy patients in data set 1 (L1 vs H1), using only CA-125 (left panel) and all four proteins (right panel). The samples from ovarian cancer patients and healthy patients in data set 2 (C2 vs H2) were used to train the model. This experiment is corresponding to experiment ID 17 in Table 3.

|           |         | Actual label |             |                    |
|-----------|---------|--------------|-------------|--------------------|
|           |         | Disease      | Healthy     | Prevalence<br>0.41 |
| Predicted | Disease | 42           | 0           | PPV<br>1           |
|           | Healthy | 13           | 80          | NPV<br>0.86        |
|           |         | Sensitivity  | Specificity | Accuracy           |
|           |         | 0.76         | 1           | 0.9                |

Using CA-125 alone

|           |         | Actual label |             |                    |
|-----------|---------|--------------|-------------|--------------------|
|           |         | Disease      | Healthy     | Prevalence<br>0.41 |
| Predicted | Disease | 48           | 0           | PPV<br>1           |
|           | Healthy | 7            | 80          | NPV<br>0.92        |
|           |         | Sensitivity  | Specificity | Accuracy           |
|           |         | 0.87         | 1           | 0.95               |

Using four proteins

Table S67: Confusion matrices when applying random forest to identify the samples of patients in late stage and healthy patients in data set 1 (L1 vs H1), using only CA-125 (left panel) and all four proteins (right panel). The samples from ovarian cancer patients and healthy patients in data set 2 (C2 vs H2) were used to train the model. This experiment is corresponding to experiment ID 17 in Table 3.

|           |         | Actual label        |                     |                    |
|-----------|---------|---------------------|---------------------|--------------------|
|           |         | Disease             | Healthy             | Prevalence<br>0.41 |
| Predicted | Disease | 43                  | 10                  | PPV<br>0.81        |
|           | Healthy | 12                  | 70                  | NPV<br>0.85        |
|           |         | Sensitivity<br>0.78 | Specificity<br>0.88 | Accuracy<br>0.83   |

Using CA-125 alone

|           |         | Actual label        |                     |                    |
|-----------|---------|---------------------|---------------------|--------------------|
|           |         | Disease             | Healthy             | Prevalence<br>0.41 |
| Predicted | Disease | 51                  | 7                   | PPV<br>0.88        |
|           | Healthy | 4                   | 73                  | NPV<br>0.95        |
|           |         | Sensitivity<br>0.93 | Specificity<br>0.91 | Accuracy<br>0.92   |

Using four proteins

Table S68: Confusion matrices when applying SVM to identify the samples of patients in late stage and healthy patients in data set 1 (L1 vs H1), using only CA-125 (left panel) and all four proteins (right panel). The samples from ovarian cancer patients and healthy patients in data set 2 (C2 vs H2) were used to train the model. This experiment is corresponding to experiment ID 17 in Table 3.

|           |         | Actual label        |                  |                    |
|-----------|---------|---------------------|------------------|--------------------|
|           |         | Disease             | Healthy          | Prevalence<br>0.41 |
| Predicted | Disease | 41                  | 0                | PPV<br>1           |
|           | Healthy | 14                  | 80               | NPV<br>0.85        |
|           |         | Sensitivity<br>0.75 | Specificity<br>1 | Accuracy<br>0.9    |

Using CA-125 alone

|           |         | Actual label        |                  |                    |
|-----------|---------|---------------------|------------------|--------------------|
|           |         | Disease             | Healthy          | Prevalence<br>0.41 |
| Predicted | Disease | 48                  | 0                | PPV<br>1           |
|           | Healthy | 7                   | 80               | NPV<br>0.92        |
|           |         | Sensitivity<br>0.87 | Specificity<br>1 | Accuracy<br>0.95   |

Using four proteins

Table S69: Confusion matrices when applying KNN to identify the samples of ovarian cancer patients and healthy patients in data set 1 (C1 vs H1), using only CA-125 (left panel) and all four proteins (right panel). The samples from ovarian cancer patients and healthy patients in data set 2 (C2 vs H2) were used to train the model. This experiment is corresponding to experiment ID 18 in Table 3.

|           |         | Actual label        |                  |                    |
|-----------|---------|---------------------|------------------|--------------------|
|           |         | Disease             | Healthy          | Prevalence<br>0.48 |
| Predicted | Disease | 52                  | 0                | PPV<br>1           |
|           | Healthy | 21                  | 80               | NPV<br>0.78        |
|           |         | Sensitivity<br>0.71 | Specificity<br>1 | Accuracy<br>0.86   |

Using CA-125 alone

|           |         | Actual label        |                  |                    |
|-----------|---------|---------------------|------------------|--------------------|
|           |         | Disease             | Healthy          | Prevalence<br>0.48 |
| Predicted | Disease | 65                  | 0                | PPV<br>1           |
|           | Healthy | 8                   | 80               | NPV<br>0.91        |
|           |         | Sensitivity<br>0.89 | Specificity<br>1 | Accuracy<br>0.95   |

Using four proteins

Table S70: Confusion matrices when applying logistic regression to identify the samples of ovarian cancer patients and healthy patients in data set 1 (C1 vs H1), using only CA-125 (left panel) and all four proteins (right panel). The samples from ovarian cancer patients and healthy patients in data set 2 (C2 vs H2) were used to train the model. This experiment is corresponding to experiment ID 18 in Table 3.

|           |         | Actual label |             |                    |
|-----------|---------|--------------|-------------|--------------------|
|           |         | Disease      | Healthy     | Prevalence<br>0.48 |
| Predicted | Disease | 51           | 0           | PPV<br>1           |
|           | Healthy | 22           | 80          | NPV<br>0.78        |
|           |         | Sensitivity  | Specificity | Accuracy           |
|           |         | 0.7          | 1           | 0.86               |

Using CA-125 alone

|           |         | Actual label |             |                    |
|-----------|---------|--------------|-------------|--------------------|
|           |         | Disease      | Healthy     | Prevalence<br>0.48 |
| Predicted | Disease | 66           | 0           | PPV<br>1           |
|           | Healthy | 7            | 80          | NPV<br>0.92        |
|           |         | Sensitivity  | Specificity | Accuracy           |
|           |         | 0.9          | 1           | 0.95               |

Using four proteins

Table S71: Confusion matrices when applying random forest to identify the samples of ovarian cancer patients and healthy patients in data set 1 (C1 vs H1), using only CA-125 (left panel) and all four proteins (right panel). The samples from ovarian cancer patients and healthy patients in data set 2 (C2 vs H2) were used to train the model. This experiment is corresponding to experiment ID 18 in Table 3.

|           |         | Actual label |             |                    |
|-----------|---------|--------------|-------------|--------------------|
|           |         | Disease      | Healthy     | Prevalence<br>0.48 |
| Predicted | Disease | 56           | 10          | PPV<br>0.85        |
|           | Healthy | 17           | 70          | NPV<br>0.8         |
|           |         | Sensitivity  | Specificity | Accuracy           |
|           |         | 0.77         | 0.88        | 0.82               |

Using CA-125 alone

|           |         | Actual label |             |                    |
|-----------|---------|--------------|-------------|--------------------|
|           |         | Disease      | Healthy     | Prevalence<br>0.48 |
| Predicted | Disease | 67           | 10          | PPV<br>0.87        |
|           | Healthy | 6            | 70          | NPV<br>0.92        |
|           |         | Sensitivity  | Specificity | Accuracy           |
|           |         | 0.92         | 0.88        | 0.9                |

Using four proteins

Table S72: Confusion matrices when applying SVM to identify the samples of ovarian cancer patients and healthy patients in data set 1 (C1 vs H1), using only CA-125 (left panel) and all four proteins (right panel). The samples from ovarian cancer patients and healthy patients in data set 2 (C2 vs H2) were used to train the model. This experiment is corresponding to experiment ID 18 in Table 3.

|           |         | Actual label |             |                    |
|-----------|---------|--------------|-------------|--------------------|
|           |         | Disease      | Healthy     | Prevalence<br>0.48 |
| Predicted | Disease | 49           | 0           | PPV<br>1           |
|           | Healthy | 24           | 80          | NPV<br>0.77        |
|           |         | Sensitivity  | Specificity | Accuracy           |
|           |         | 0.67         | 1           | 0.84               |

Using CA-125 alone

|           |         | Actual label |             |                    |
|-----------|---------|--------------|-------------|--------------------|
|           |         | Disease      | Healthy     | Prevalence<br>0.48 |
| Predicted | Disease | 64           | 0           | PPV<br>1           |
|           | Healthy | 9            | 80          | NPV<br>0.9         |
|           |         | Sensitivity  | Specificity | Accuracy           |
|           |         | 0.88         | 1           | 0.94               |

Using four proteins



Figure S1: The AUC and Youden index when applying KNN, logistic regression, and random forest to identify control and healthy samples in experiment 1 in Table 8, using only CA-125 and all four proteins.



Figure S2: The AUC and Youden index when applying KNN, logistic regression, and random forest to identify control and healthy samples in experiment 2 in Table 8, using only CA-125 and all four proteins.



Figure S3: The AUC and Youden index when applying KNN, logistic regression, and random forest to identify control and healthy samples in experiment 3 in Table 8, using only CA-125 and all four proteins.



Figure S4: The AUC and Youden index when applying KNN, logistic regression, and random forest to identify control and healthy samples in experiment 4 in Table 8, using only CA-125 and all four proteins.



Figure S5: The AUC and Youden index when applying KNN, logistic regression, and random forest to identify control and healthy samples in experiment 5 in Table 8, using only CA-125 and all four proteins.



Figure S6: The AUC and Youden index when applying KNN, logistic regression, and random forest to identify control and healthy samples in experiment 6 in Table 8, using only CA-125 and all four proteins.



Figure S7: The AUC and Youden index when applying KNN, logistic regression, and random forest to identify control and healthy samples in experiment 7 in Table 8, using only CA-125 and all four proteins.



Figure S8: The AUC and Youden index when applying KNN, logistic regression, and random forest to identify control and healthy samples in experiment 8 in Table 8, using only CA-125 and all four proteins.



Figure S9: The AUC and Youden index when applying KNN, logistic regression, and random forest to identify control and healthy samples in experiment 9 in Table 8, using only CA-125 and all four proteins.



Figure S10: The AUC and Youden index when applying KNN, logistic regression, and random forest to identify control and healthy samples in experiment 10 in Table 8, using only CA-125 and all four proteins.



Figure S11: The AUC and Youden index when applying KNN, logistic regression, and random forest to identify control and healthy samples in experiment 11 in Table 8, using only CA-125 and all four proteins.



Figure S12: The AUC and Youden index when applying KNN, logistic regression, and random forest to identify control and healthy samples in experiment 12 in Table 8, using only CA-125 and all four proteins.



Figure S13: The AUC and Youden index when applying KNN, logistic regression, and random forest to identify control and healthy samples in experiment 13 in Table 8, using only CA-125 and all four proteins.



Figure S14: The AUC and Youden index when applying KNN, logistic regression, and random forest to identify control and healthy samples in experiment 14 in Table 8, using only CA-125 and all four proteins.



Figure S15: The AUC and Youden index when applying KNN, logistic regression, and random forest to identify control and healthy samples in experiment 15 in Table 8, using only CA-125 and all four proteins.



Figure S16: The AUC and Youden index when applying KNN, logistic regression, and random forest to identify control and healthy samples in experiment 16 in Table 8, using only CA-125 and all four proteins.



Figure S17: The AUC and Youden index when applying KNN, logistic regression, and random forest to identify control and healthy samples in experiment 17 in Table 8, using only CA-125 and all four proteins.



Figure S18: The AUC and Youden index when applying KNN, logistic regression, and random forest to identify control and healthy samples in experiment 17 in Table 8, using only CA-125 and all four proteins.
